# Supplementary material
Source: PubMed Central journal article supplement (PMC3684217)
Supplement: supp_13-11672_IOVS-13-11672-s01.pdf [file supp_13-11672_IOVS-13-11672-s01.pdf]

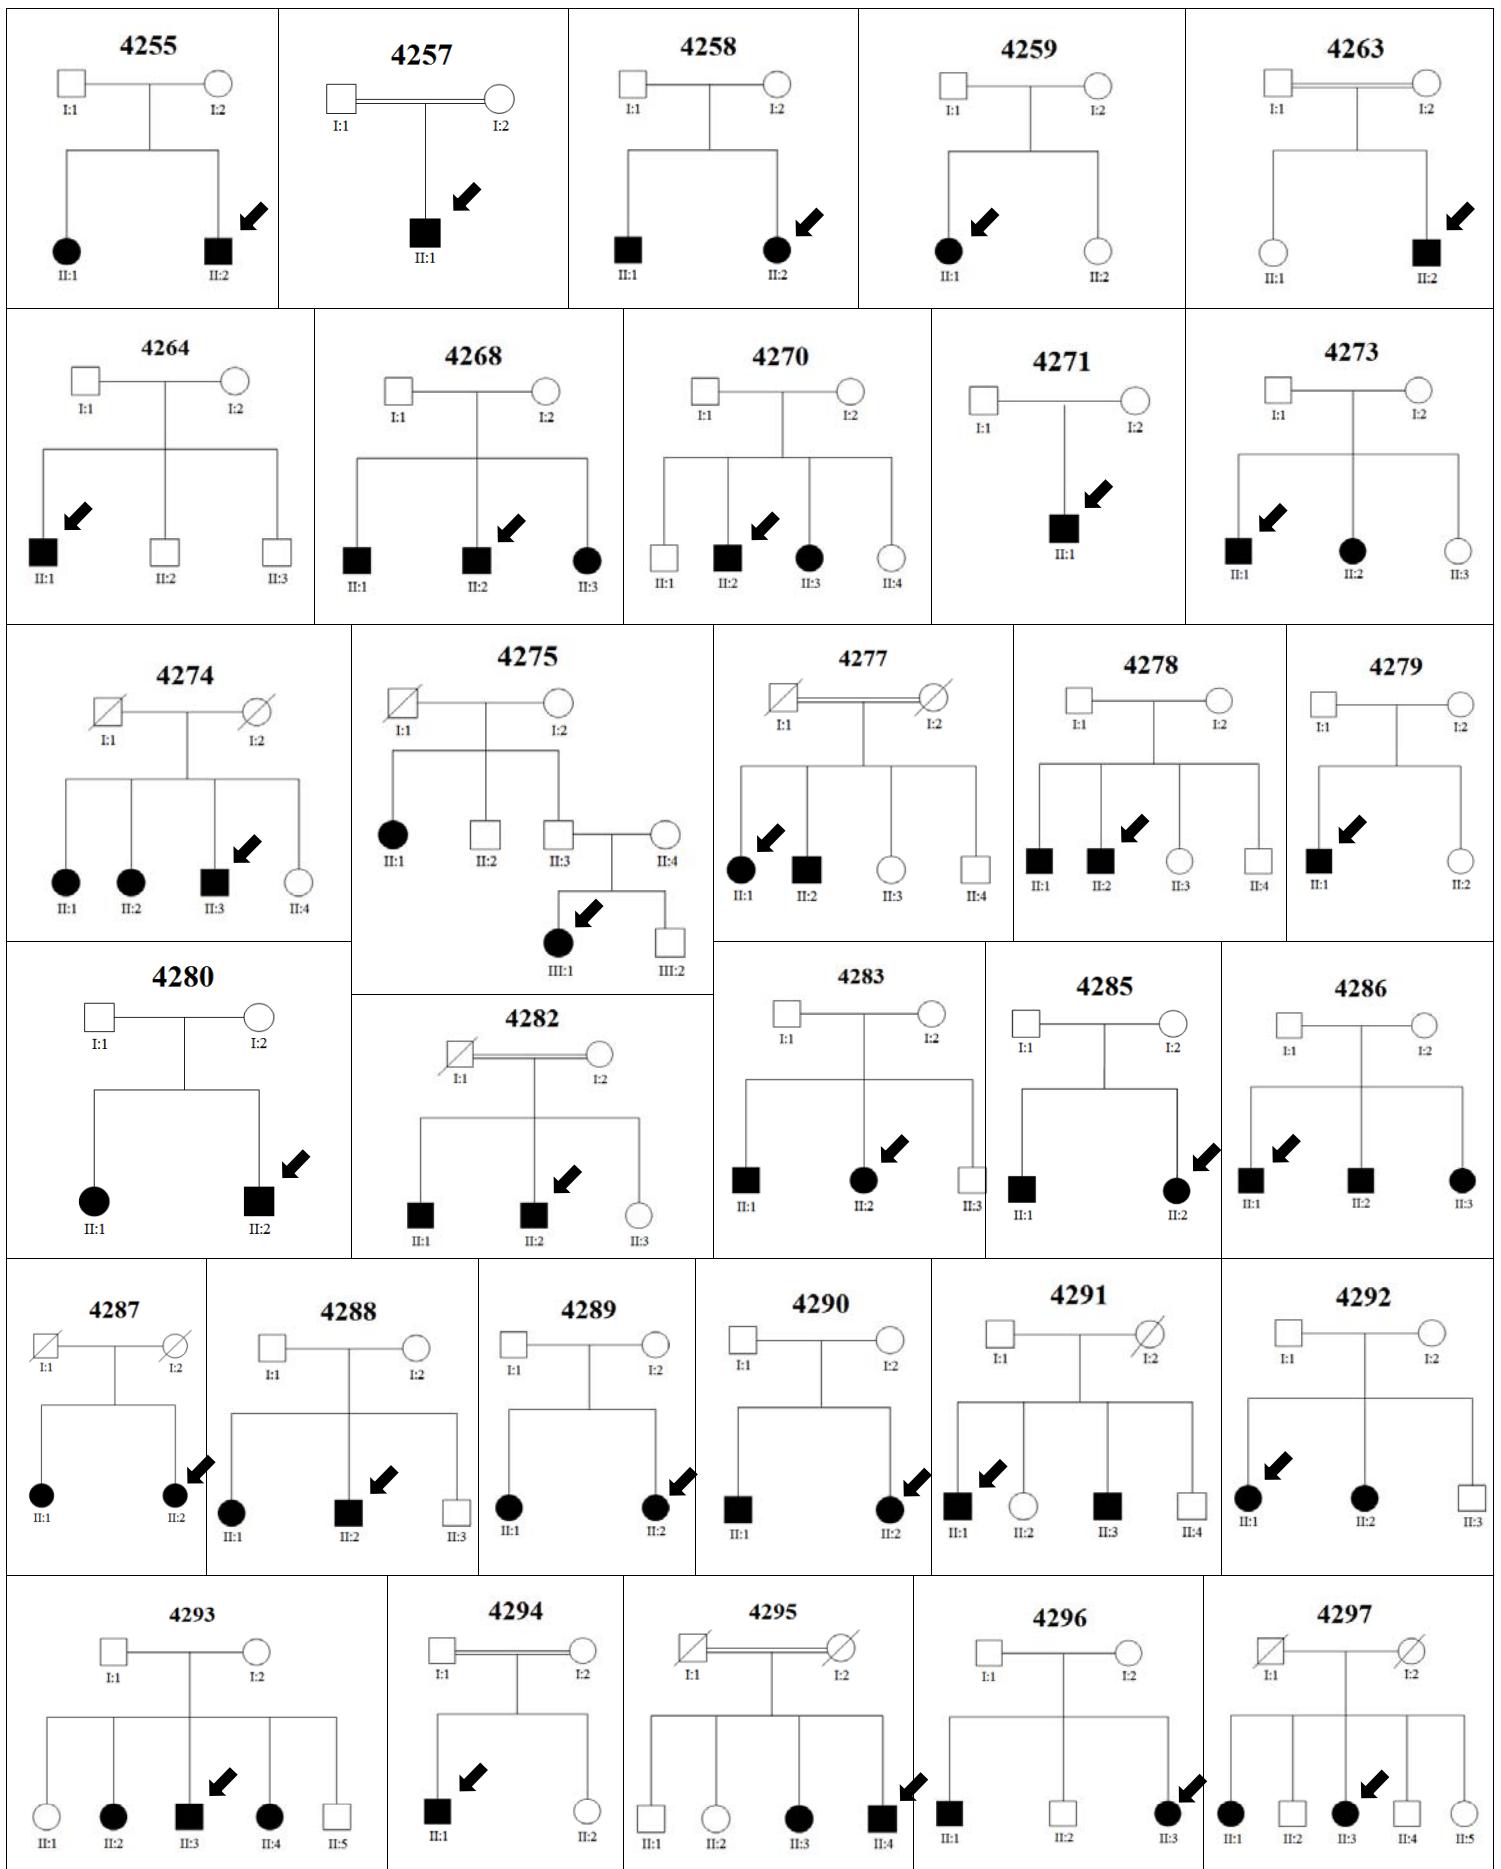

**Supplemental figure 1. Pedigrees of all 31 families. Arrows show family members who underwent capture-NGS based molecular diagnosis.**

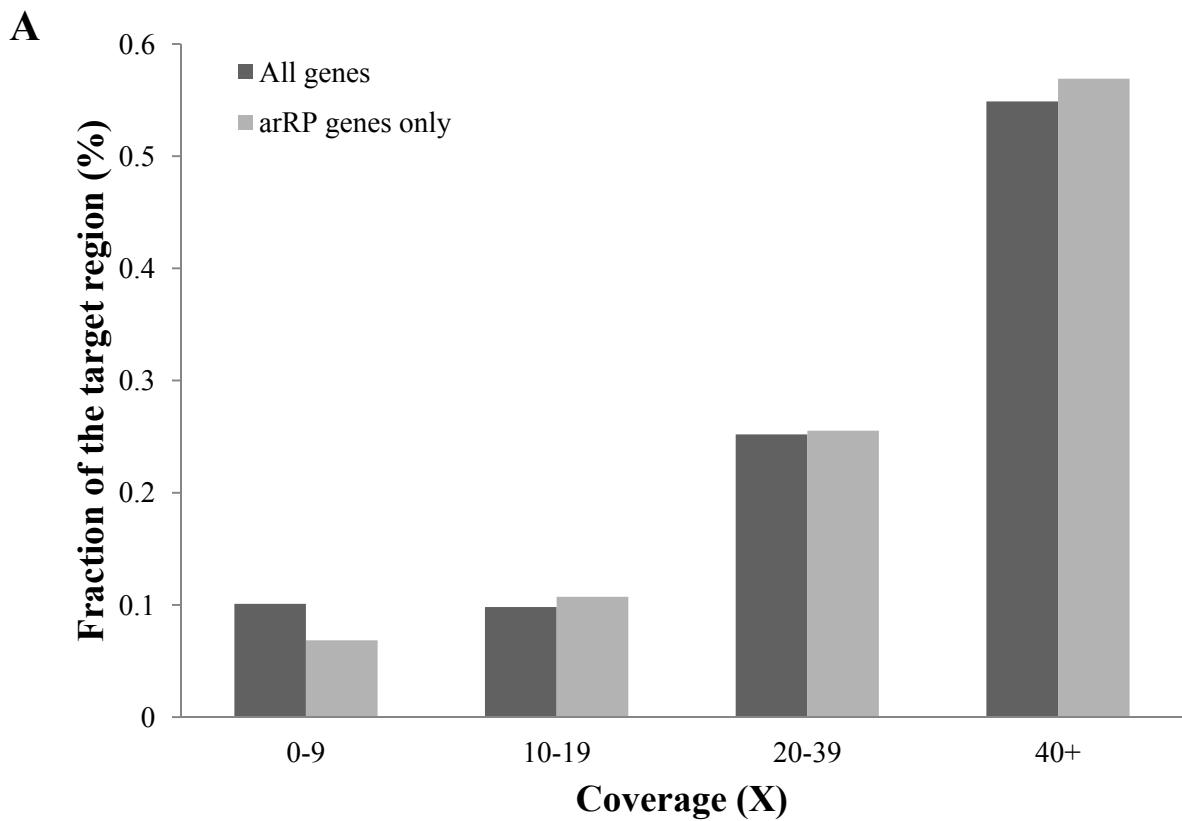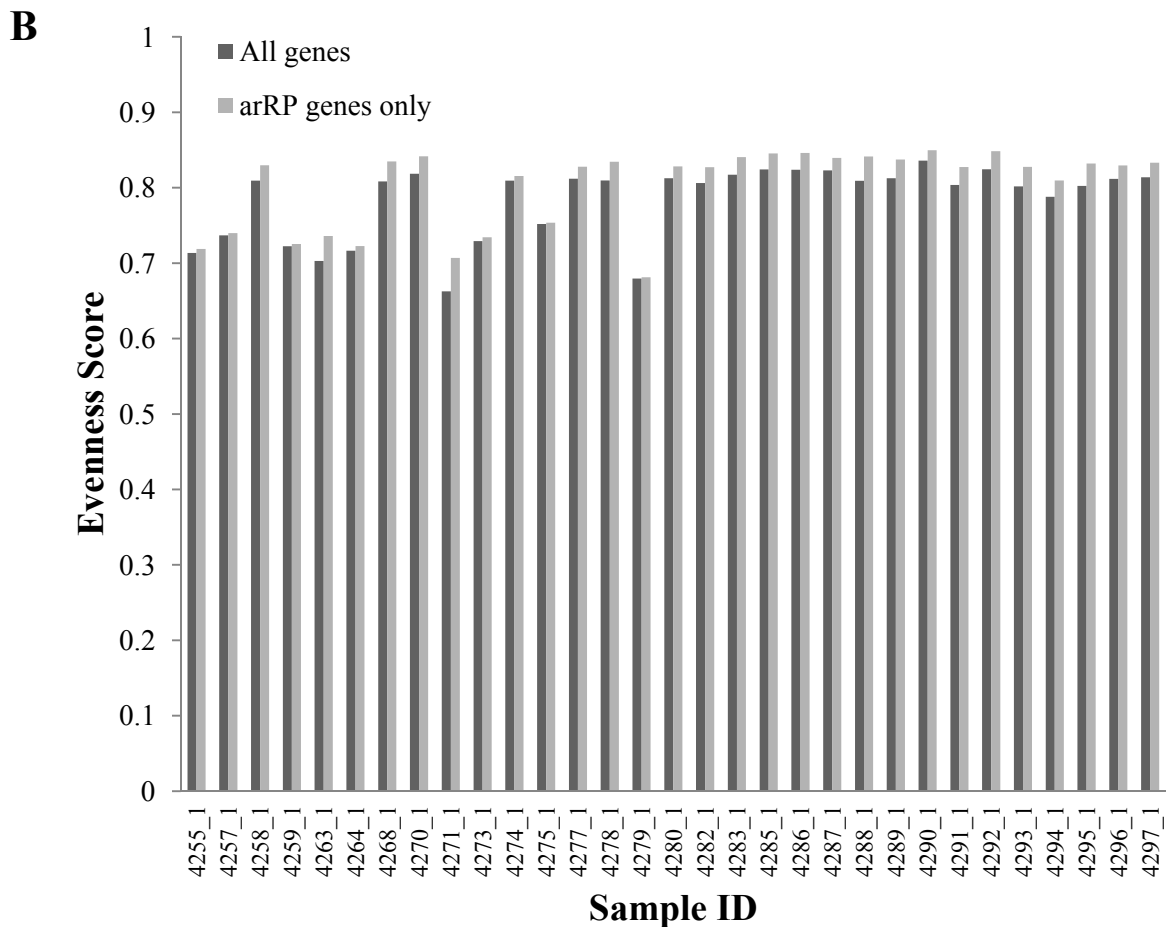

**Supplemental figure 2. High quality sequencing results were obtained.** A. The distribution of target region from all 163 retinal disease genes (black) or 29 arRP genes only (grey) under different range of coverage. B. The evenness score of each sample calculated based on targeted regions from all 163 retinal disease genes (black) or 29 arRP genes only (grey).

**A**

**4263\_1**

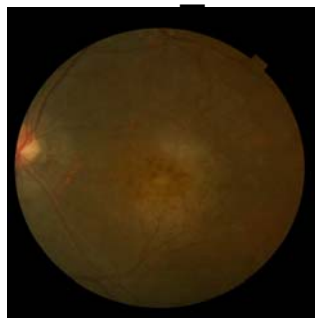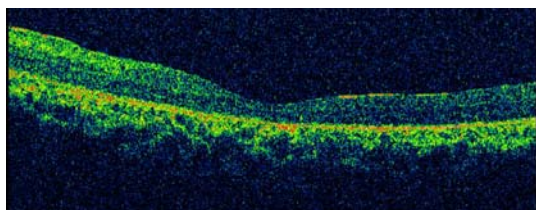

**B**

**4279\_1**

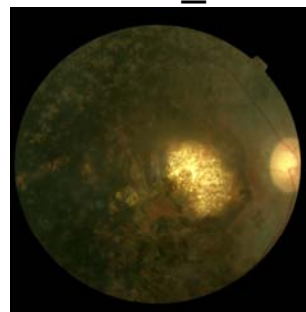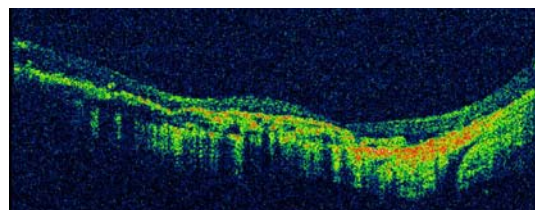

**C**

**4293\_1**

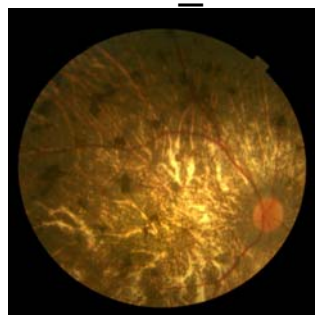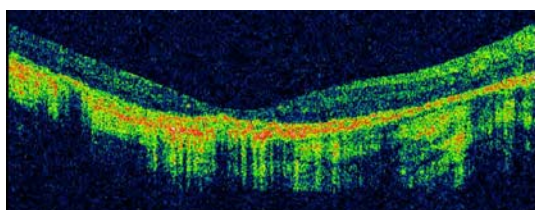

**Supplemental figure 3. Fundus images and OCTs of patients 4263\_1, 4279\_1 and 4293\_1. A. Fundus image (up) and OCT (down) of patient 4263\_1. B. Fundus image (up) and OCT (down) of patient 4279\_1. C. Fundus image (up) and OCT (down) of patient 4293\_1.**
